# Supplementary material
Source: Springer Nature journal article supplement (https://www.springermedizin.de/resource/supplementary/13014_2012_575_MOESM1_ESM.pdf/9634170)

**Local N=16**

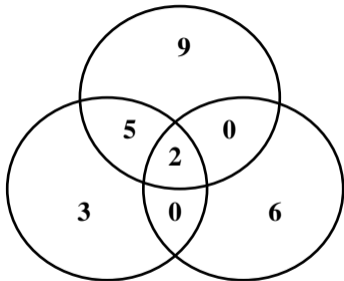

**Regional N=10**

**Distant N=8**

Supplement: MOESM1 [file 9634170]
